# Supplementary material
Source: PubMed Central journal article supplement (PMC4750405)

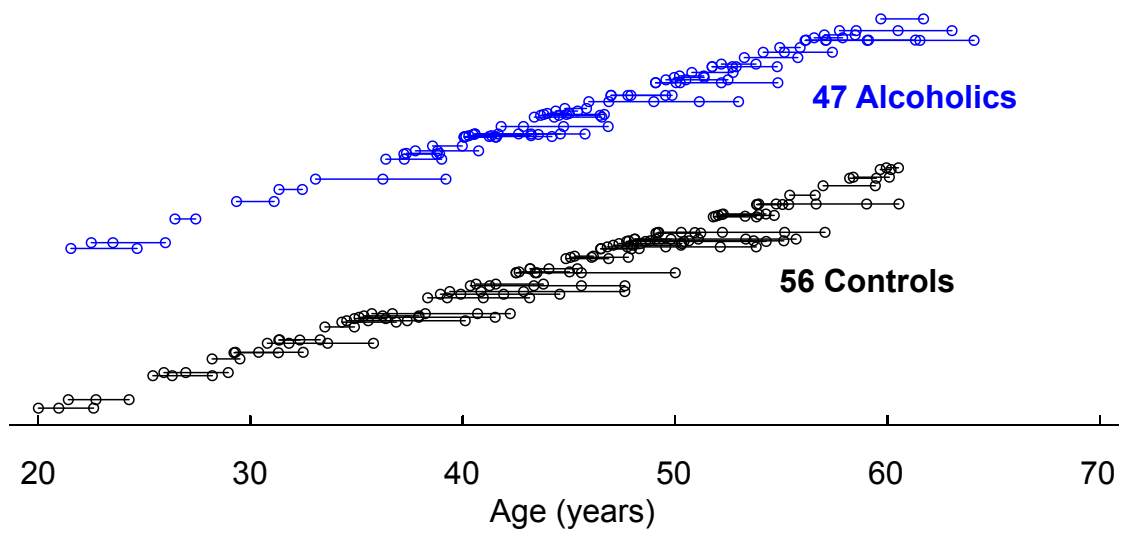

Supplementary Information Figure

Supplement: NIHMS648474-supplement-01.pdf [file NIHMS648474-supplement-01.pdf]

## Participant flow chart for MRI+DTI collection

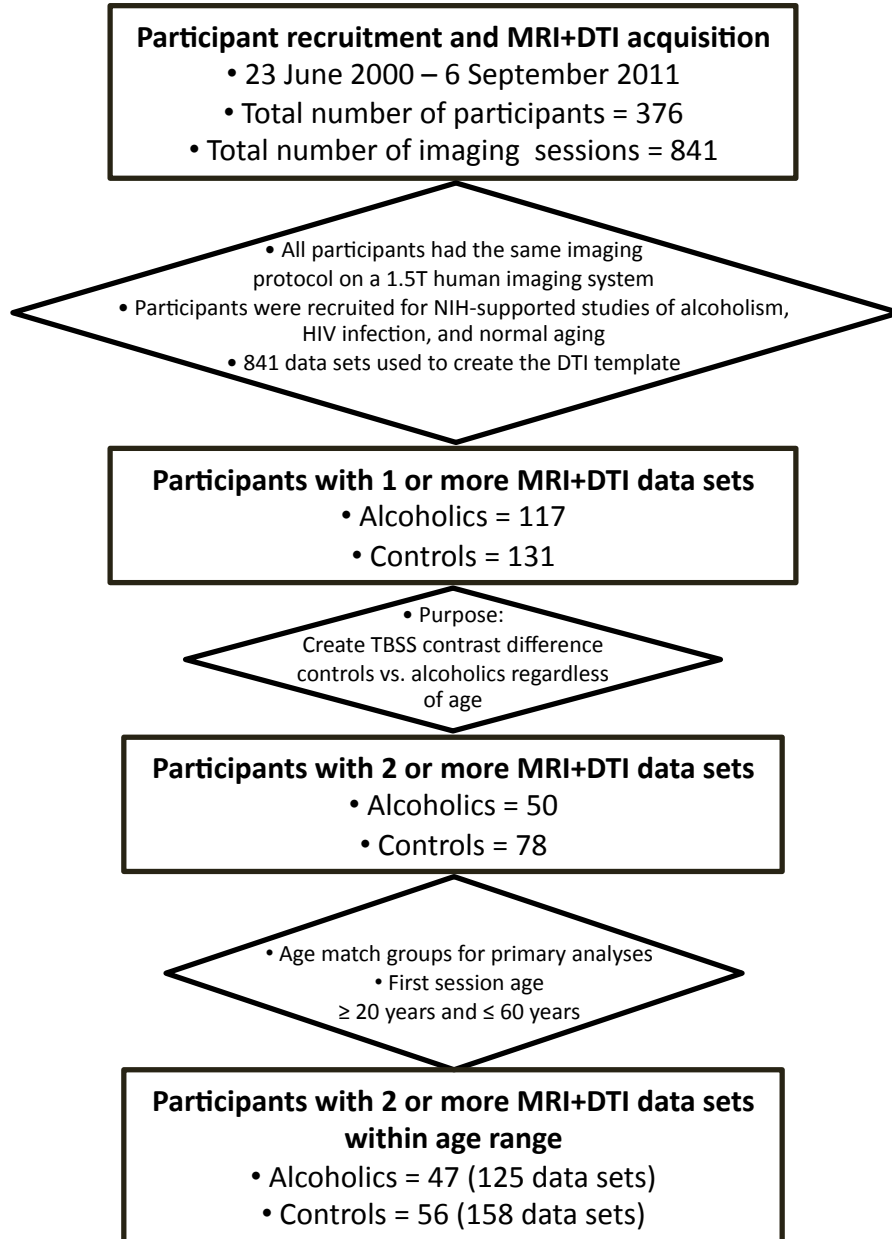

Supplement: NIHMS648474-supplement-Flow_Chart.pdf [file NIHMS648474-supplement-Flow_Chart.pdf]
